# Supplementary material for: Comprehensive increase in CO 2 release by drying–rewetting cycles among Japanese forests and pastureland soils and exploring predictors of increasing magnitude
Source: Copernicus journal article supplement (doi:10.5194/soil-11-35-2025), 2025-01-16
Supplement: Supplementary file 1 [file soil-11-35-2025-supplement.pdf]

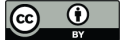

*Supplement of*

**Comprehensive increase in CO<sub>2</sub> release by drying–rewetting cycles among Japanese forests and pastureland soils and exploring predictors of increasing magnitude**

**Yuri Suzuki et al.**

*Correspondence to:* Hirohiko Nagano (hnagano@agr.niigata-u.ac.jp)

The copyright of individual parts of the supplement might differ from the article licence.

Fig. S1

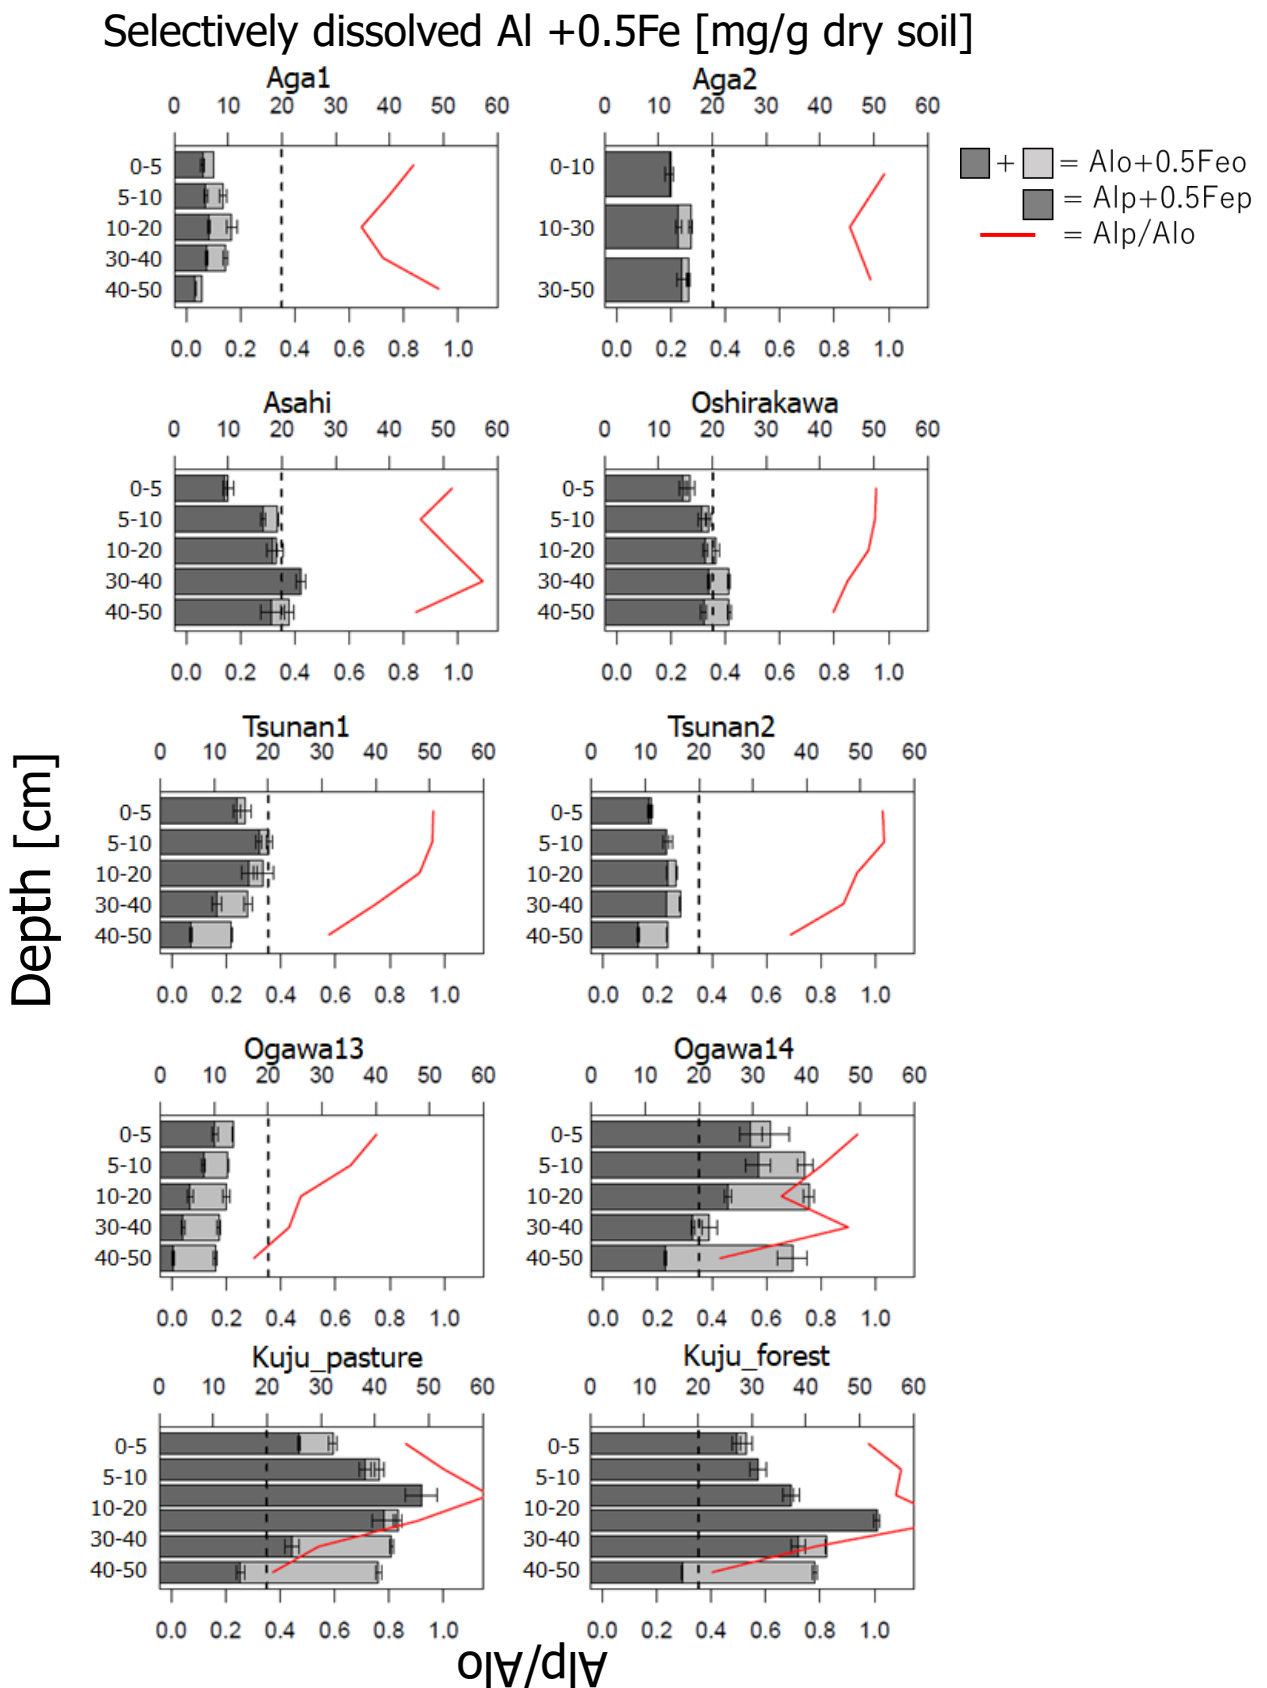

Fig. S1. Vertical profiles of selectively dissolved Al + 0.5Fe contents ( $Al_o + 0.5Fe_o$ ,  $Al_p + 0.5Fe_p$ ) and  $Al_p/Al_o$  for soils from 0 to 50cm depth.

Fig. S2

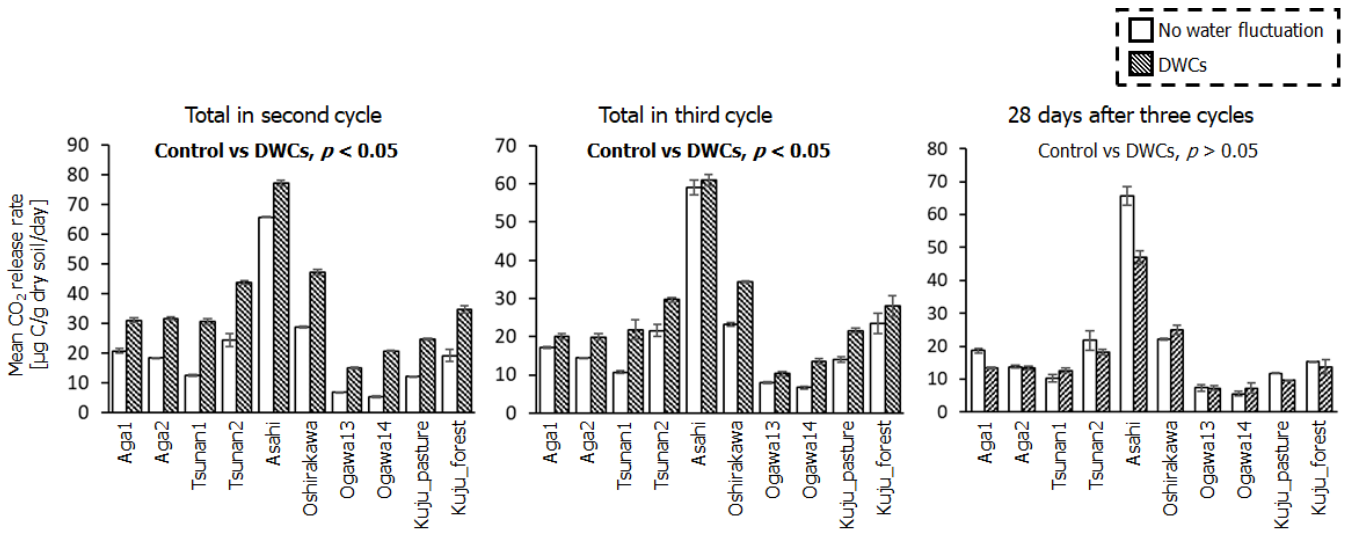

Fig. S2. Comparisons of mean CO<sub>2</sub> release rate for second cycle, third cycle, and the post 28-days incubation after the three cycles between DWCs and continuously constant moisture conditions. Statistically significant differences ( $p < 0.05$  by pairwise t-test) in CO<sub>2</sub> release rate between two treatments were also presented.

Fig. S3

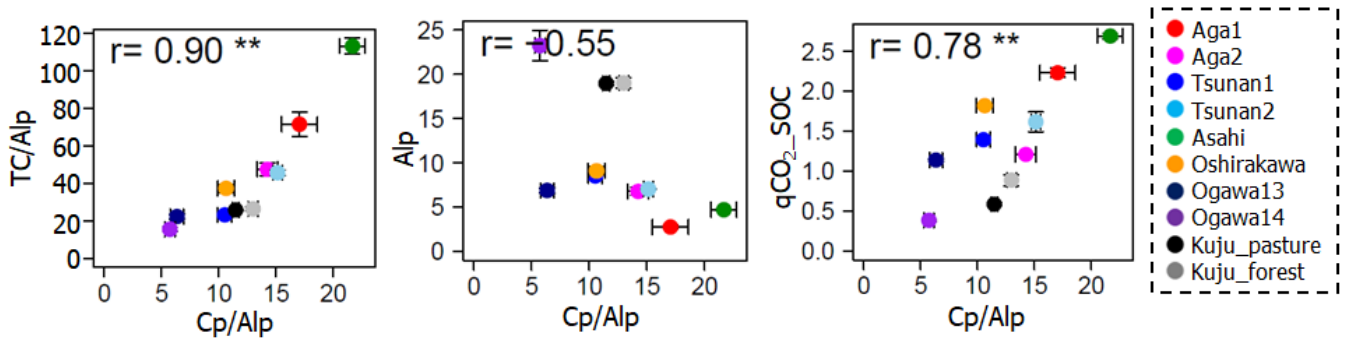

Fig. S3. Relations among soil Alp contents, Cp to Alp molar ratio, and  $qCO_2\_soc$ . Statistically significant correlation coefficients at  $p < 0.01$  and  $p < 0.05$  are presented with single (\*) and double asterisks (\*\*), respectively.

Fig. S4

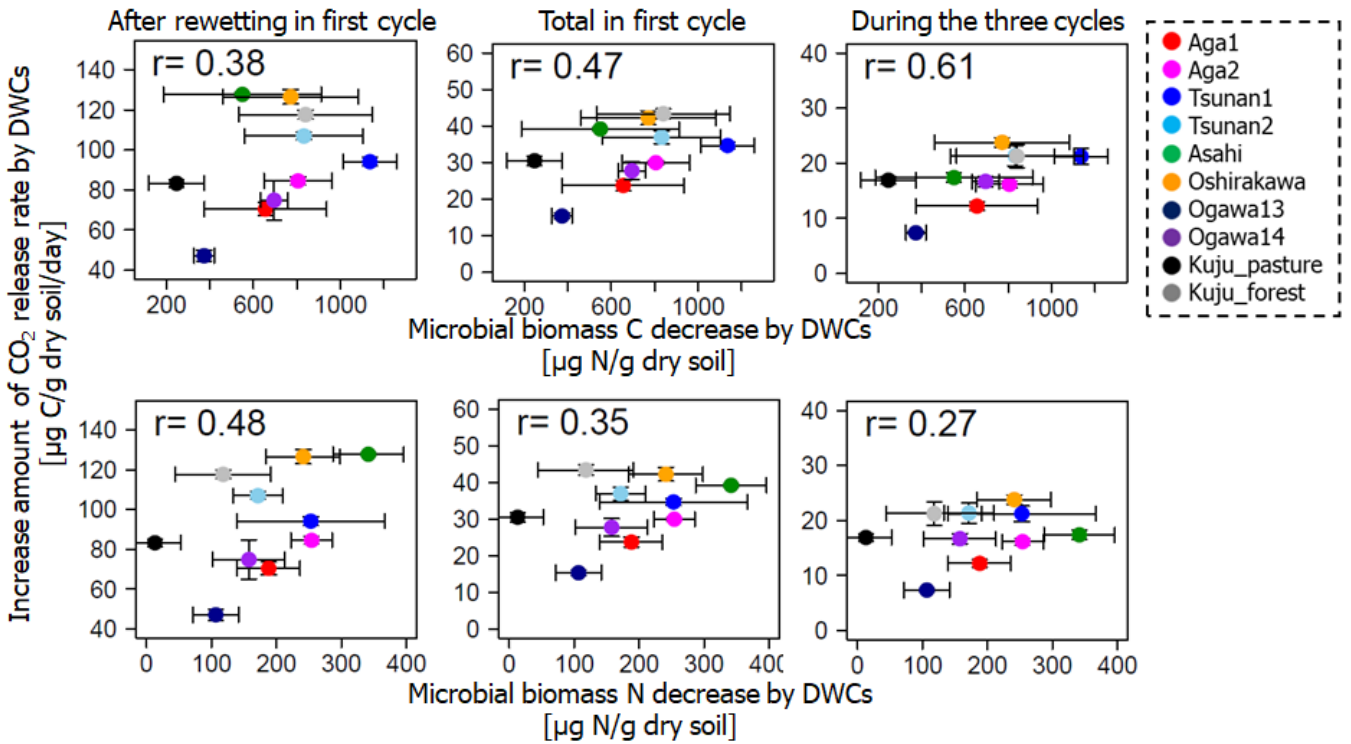

Fig. S4. Relations between the amount of CO<sub>2</sub> release increase and the microbial biomass C or N decrease by dry-wet cycles. There was no relationship showing significant correlation ( $p > 0.05$ ).
